# Supplementary material for: Regenerative neurogenic response from glia requires insulin-driven neuron-glia communication
Source: eLife. 2021 Feb 2;10:e58756. doi: 10.7554/eLife.58756 (PMC7880684; doi:10.7554/eLife.58756)
Supplement: Supplementary file 1. — This table contains full genotypes for all experiments, sample sizes used, and statistical analysis details including normality tests, tests applied, and multiple comparison correction tests. [file elife-58756-supp1.xls]

## Sheet: Sheet1
Neale Harrison1,2*, Elizabeth Connolly1*, Alicia Gascón Gubieda1,3, Zidan Yang1,4, Benjamin Altenhein5, Maria Losada-Perez6, Marta Moreira1 and Alicia Hidalgo1
SUPPLEMENTARY TABLE 1
FIGURE	DATA	GENOTYPE OR EXPERIMENT	SAMPLE TYPE	COMPARISON	TEST	NORMALITY	HOMOGENEITY	DESCRIPTIVE	DF & TEST	p VALUE	MULTIPLE COMPARISONS
		TYPE	& N			TESTS	OF VARIANCE	STATISTICS	VALUE		& CORRECTION
Fig. 1A		Genotype	Number of replicates		Test			Mean±s.d.		One Way ANOVA
		UASkonRNAi[KK102101]/+	6		One-Way ANOVA			1 ± 0	F (2, 11) = 35.29	<0.0001	Dunnett's multiple comparisons test
	qRT-PCR	kon[c452] UAS-konRNAi[KK102101]/+ ; elavGal4/+	4	UASkonRNAi[KK102101]/+ vs kon[c452] UAS-konRNAi[KK102101]/+ ; elavGal4/+				1.092 ± 0.179			ns
	ia-2 mRNA in kon GOF and LOF	kon[c452] UAS-konRNAi[KK102101]/+ ; repoGal4/+	4	UASkonRNAi[KK102101]/+ vs kon[c452] UAS-konRNAi[KK102101]/+ ; repoGal4/+				2.444 ± 0.680			****
		UAS kon FL1-4/+			One-Way ANOVA				F (2, 9) = 4.462	0.045	Dunnett's multiple comparisons test
		UAS kon FL1-4/+; elavGal4/+	4	UAS kon FL1-4/+ vs elavGal4/UASkon FL1-4				0.736 ± 0.107			*
		UAS kon FL1-4/+; repoGal4/+	4	UAS kon FL1-4/+ vs repoGal4/UASkon FL1-4				0.765 ± 0.94			ns
Fig. 1B		Genotype	Number of replicates					Mean±s.d.		One Way ANOVA
	qRT-PCR				One-Way ANOVA				F (2, 13) = 4.486	0.033	Dunnett's multiple comparisons test
	kon mRNA in ia-2 GOF and LOF	UAS ia-2[GS11438]/+	6					1 ± 0
		UAS ia-2[GS11438]/+;elavGal4/+	4	UAS ia-2[GS11438]/+ vs UAS ia-2[GS11438]/+;elavGal4/+				1.058 ± 0.207			ns
		UAS ia-2[GS11438] /+;repoGal4/+	6	UAS ia-2[GS11438]/+ vs UAS ia-2[GS11438] /+;repoGal4/+				0.760 ± 0.206			*
		UASia-2 RNAi[TRIP HMS00536]/+	6		Unpaired Student t test with Welch's correction			1 ± 0	t=0.7758, df=9.377	Student t test
		elavGal4/UASia-2RNAi[TRIP HMS00536]	6	UASia-2 RNAi[TRIP HMS00536]/+ vs elavGal4/UASia-2RNAi[TRIP HMS00536]				0.913 ± 0.298		0.457	ns
Fig. 1C		Genotype	Number of replicates					Mean±s.d.		Student t test
	qRT-PCR	repoGal4/+	3		Unpaired Student t test with Welch's correction			1 ± 0	t=1.587, df=2.764	0.2182
	ia-2 mRNA in Notch GOF and LOF	UAS Notch[ICD]/+; repoGal4/+	3	repoGal4/+ vs repoGal4/UAS Notch[ICD]				0.791 ± 0.195			ns
		Oregon R	3		Unpaired Student t test with Welch's correction			1 ± 0	t=0.9170, df=3.899	0.4123
		Notch [ts]	3	Oregon vs Notch[ts]				1.819 ± 0.385			ns
Fig. 1D		Genotype	Number of replicates					Mean±s.d.		Student t test
	qRT-PCR	Oregon R	3		Unpaired Student t test with Welch's correction			1 ± 0	t=1.953, df=3.326	0.1368
	ia-2 mRNA in pros LOF and GOF	prosvoila1/prosS044116	3	Oregon vs prosvoila1/prosS044116				1.520 ± 0.387			ns
		repoGal4/+	3		Unpaired Student t test with Welch's correction			1 ± 0	t=2.947, df=3.943	0.0428
		UASprosK/+;repoGal4/+	3	repoGal4/+ vs UAS prosK/+;repoGal4+				1.909 ± 0.886			*
Fig. 1E		Genotype	Number of replicates					Mean±s.d.		One Way ANOVA
	qRT-PCR	UASia-2 RNAi[TRIP HMS00536]/+	3		One-Way ANOVA			1 ± 0	F (2, 6) = 38.32	0.0004	Dunnett's multiple comparisons test
	ia-2 mRNA in ia2 LOF in neurons and glia	elavGal4/UAS ia-2RNAi [TRIP HMS00536]	3	UASia-2 RNAi[TRIP HMS00536]/+ vs elavGal4/UAS ia-2RNAi [TRIP HMS00536]				0.157 ± 0.083			***
		repoGal4/UAS ia-2RNAi [TRIP HMS00536]	3	UASia-2 RNAi[TRIP HMS00536]/+ vs repoGal4/UAS ia-2RNAi [TRIP HMS00536]				0.997 ± 0.168			ns
		UAS ia-2 RNAi/+	3		Unpaired Student t test with Welch's correction			1 ± 0	t=0.7845, df=3.855	0.4782
		UAS ia-2RNAi [KK108555-VIE-260B]/;elavGal4/+	3	UAS ia-2 RNAi/+ vs UAS ia-2RNAi [KK108555-VIE-260B]/;elavGal4/+				0.750 ± 0.165			ns
Fig. 1F,G,H		Genotype	Number of larvae
	ia-2 expression in VNC of L3W/120AEL				N/A	N/A	N/A	N/A	N/A	N/A	N/A
	YFP Elav	w1118; PBac{566.P.SVS-1}ia-2CPTI100013 (ia-2 YFP)	8
	YFP Repo	w1118; PBac{566.P.SVS-1}ia-2CPTI100013 (ia-2 YFP)	4
	YFP Dpn (120AEL)	w1118; PBac{566.P.SVS-1}ia-2CPTI100013 (ia-2 YFP)	16
Fig. 2A,B		Genotype				Kolmogorov-Smirnov	Bartlett's test	Mean±s.d.		One Way ANOVA
	Number of ia-2YFP+ cells in kon GOF and LOF	ia-2YFP/+	5		One-Way ANOVA	>0.1000	0.0687	145.4 ± 9.450	F= 7.694 d.f.1=3 d.f.2=46	<0.0001	Tukey's multiple comparison
		ia-2YFP/kon[c452] UAS konRNAi[KK102101]/+; repoGal4/+	7	ia-2YFP/+ vs ia-2YFP/kon[c452] UAS konRNAi[KK102101]/+; repoGal4/+		>0.1000		204.7 ± 19.38			<0.0001	****
		ia-2YFP/UAS kon FL; repoGal4/+	7	ia-2YFP/+ vs ia-2YFP/UAS kon FL; repoGal4/+		>0.1000		125.7 ± 6.075			0.0777	ns
		ia-2YFP/UAS kon FL; elavGal4/+	8	ia-2YFP/+ vs ia-2YFP/+;ElavGal4/konFL		>0.1000		138.6 ± 12.84			0.8035	ns
				ia-2YFP/kon[c452] UAS konRNAi[KK102101]/+; repoGal4/+vs ia-2YFP/UASkonFL;repoGal4/+		>0.1000					<0.0001	****
				ia-2YFP/kon[c452] UAS konRNAi[KK102101]/+; repoGal4/+ vs ia-2YFP/UAS kon FL; elavGal4/+		>0.1000					<0.0001	****
				ia-2YFP/UAS kon FL; repoGal4/+vs ia-2YFP/UAS kon FL; elavGal4/+		>0.1000					0.2578	ns
Fig. 2C		Genotype	Number of larvae
	ia-2YFP in kon LOF				N/A	N/A	N/A	N/A	N/A	N/A	N/A
	YFP+ Repo+	ia-2YFP/kon[c452] UAS konRNAi[KK102101]/+; repoGal4/+	7
	YFP+ Elav+	ia-2YFP/kon[c452] UAS konRNAi[KK102101]/+; repoGal4/+	5
Fig. 2D,E		Genotype	Number of larvae			Kolmogorov-Smirnov	Bartlett's test	Mean±s.d.		One Way ANOVA
	Ia-2 doesn't affect Eve+ neurons	yw/Oregon	11		One-Way ANOVA	>0.1000	0.4345	209.2 ± 8.716	F (3, 34) = 1.480	0.2374	ns
	YFP Eve	UAS ia-2[GS1138]/+; elavGal4/+	7	yw/+ vs UAS ia-2[GS1138]/+; elavGal4/+		>0.1000		211.3 ± 8.321
		elavGal4/UASia-2-RNAi [TRIP HMS00536]	12	yw/+ vs elavGal4/UASia-2-RNAi [TRIP HMS00536]		>0.1000		203.0 ± 13.60
		Df(2L)ED7733 /+;elavGAL4/UASia-2-RNAi [TRIP HMS00536]	8	yw/+ vs Df(2L)ED7733 /+;elavGAL4/UASia-2-RNAi [TRIP HMS00536]		>0.1000		202.4 ± 10.45
Fig. 2F,G		Genotype	Number of larvae			Kolmogorov-Smirnov		Mean±s.d.		KW ANOVA
	Pros+ cells in abdominal VNC in ia-2 GOF and LOF				Kruskal-Wallis ANOVA		N/A		19.1	0.0003	Dunn's multiple comparisons test
		yw	10			>0.1000		185.2 ± 21.45
		w;elavGAL4/UASia-2-RNAi[TRIP HMS00536]	26	yw vs w;elavGAL4/UASia-2-RNAi[TRIP HMS00536]		0.0243		213.5 ± 19.42			0.0056	**
		w;elavGAL4/UASia-2attp2	8	yw vs w;elavGAL4/UASia-2attp2		>0.1000		191.6 ± 15.62			> 0.9999	ns
	Pros	w;repoGAL4/UASia-2attp2	8	yw vs w;repoGAL4/UASia-2attp2		>0.1000		175.5 ± 27.88			> 0.9999	ns
Fig. 2H		Genotype	Number of larvae
	Pros and Repo in ia-2 LOF	elavGAL4/UASia-2-RNAi[TRIP HMS00536]		N/A	N/A	N/A	N/A	N/A	N/A	N/A	N/A	N/A
	Pros, Repo	elavGAL4/UASia-2-RNAi[TRIP HMS00536]	5
	Pros, Elav	elavGAL4/UASia-2-RNAi[TRIP HMS00536]	9
Fig. 2I		Genotype	Number of larvae
	Dpn+ VNC cells 120h AEL in ia-2 LOF	elavGAL4/+	10	N/A	N/A	N/A	N/A	N/A	N/A	N/A	N/A	N/A
		Df(2L)ED7733/+;elavGAL4/UASia-2-RNAi[TRIP HMS00536]	12
Fig. 2J,K		Genotype	Number of larvae			Kolmogorov-Smirnov	Bartlett's test	Mean±s.d.		One Way ANOVA
	Dpn+ abdominal VNC cells 120h AEL in ia-2 GOF and LOF	elavGAL4/+	10		One-Way ANOVA	>0.1000	< 0.0001	9 ± 4.082	F (4, 49) = 6.705	0.0002	Dunnett's multiple comparisons test
		elavGAL4/UASia-2attp2	7	elavGAL4/+ vs elavGAL4/UASia-2attp2		>0.1000		20.57 ± 6.399			0.012	*
		Df(2L)ED7733/+;elavGAL4/UASia-2-RNAi[TRIP HMS00536]	12	elavGAL4/+ vs Df(2L)ED7733/+;elavGAL4/UASia-2-RNAi[TRIP HMS00536]		>0.1000		24.50 ± 12.96			< 0.0001	****
		elavGAL4/UASia-2-RNAi[TRIP HMS00536]	15	elavGAL4/+ vs elavGAL4/UASia-2-RNAi[TRIP HMS00536]		>0.1000		13.80 ± 6.236			0.3531	ns
		UASia-2RNAi[KK108555-VIE-260B]/+;elavGAL4/+	10	elavGAL4/+ vs UASia-2RNAi[KK108555-VIE-260B]/+;elavGAL4/+		0.0776		16.70 ± 2.406			0.0908	ns
Fig. 3B		Data	Number of replicates							Student t test
	qRT-PCR ia-2 mRNA in injury	G9 non injured 5-7hrs	3		Unpaired Student t test with Welch's correction				t=4.293, df=4	0.0127
	5-7h after injury	G9 injured 5-7hrs	3	Injured vs Non injured 5-7hrs				1.805 ± 0.222			*
		G9 non injured 24hrs	3		Unpaired Student t test with Welch's correction				t=1.509, df=4	0.2059
	24h after injury	G9 injured 24hrs	3	Injured vs Non injured 24hrs				1.274 ± 0.133			ns
Fig. 3D		Data	Number of larvae			Kolmogorov-Smirnov		Mean±s.d.	Mann Whitney U	Mann Whitney U
	Injury at 74-80h AEL Ia-2YFP, Dpn	ia-2YFP Non-injured	17	Non-injured ia-2YFP vs Injured ia-2YFP 74-80h AEL	Mann Whitney U-test	0.0139	N/A	41.24±16.27	sum of ranks 55, 135	0.2402	ns
	Only samples with ectopic Dpn+ cells	ia-2YFP Injured	5			>0.10000		48.20±11.32	Mann-Whitney U=19
Fig. 3E,F,G,H,I		Data	Number of larvae			Kolmogorov-Smirnov	Levene's test	Mean±s.d.	Student -t	Student t test
	Injury at 96-102h AEL Ia-2YFP, Dpn	ia-2YFP Non-injured	5	Non-injured ia-2YFP vs Injured ia-2YFP 96-102h AEL	Unpaired Student t test	>0.10000	0.2125	10.40±3.715	t=3.305 df=12	0.0063	**
		ia-2YFP Injured	9			>0.10000		22.00±7.246
Fig. 3J		Data	Number of larvae			Kolmogorov-Smirnov		Mean±s.d.	Mann Whitney U	Mann Whitney U
	Injury at 105-129 AEL Ia-2YFP, Dpn	ia-2YFP Non-injured	8	Non-injured ia-2YFP vs Injured ia-2YFP 105-129 AEL	Mann Whitney U-test	>0.10000	N/A	13.25±5.064	sum of ranks 180 , 73	0.0375	*
		ia-2YFP Injured	11			0.0326		16.55±3.908	Mann-Whitney U=27
Fig. 3K,L,M,N,O		Data	Number of larvae			Kolmogorov-Smirnov	Levene's test	Mean±s.d.	Student -t	Student t test
	Injury at 117-129h AEL Ia-2YFP, Dpn	ia-2YFP Non-injured	8	Non-injured ia-2YFP vs Injured ia-2YFP 117-129h AEL	Unpaired Student t test	0.0897	0.3626	12.00±3.742	t=2.288 df=27	0.0302	*
		ia-2YFP Injured	21			>0.10000		16.67±5.257
Fig. 3P		Data	Number of larvae			Kolmogorov-Smirnov		Mean±s.d.		KW ANOVA
	Only samples with ectopic Dpn+ cells	ia-2YFP Injured 74-80h AEL	5		Kruskal-Wallis ANOVA	>0.10000	N/A	3.800±0.8367	3.207	0.3607	ns
	All time points	ia-2YFP Injured 96-102h AEL	8			>0.10000		3.000±0.9258
		ia-2YFP Injured 105-129h AEL	6			>0.10000		3.000±1.549
		ia-2YFP Injured 117-129h AEL	12			0.0158		2.667±1.371
Fig. 4A,B		Data	Number of larvae
	dilp-6 GAL4 expression in L3W VNC				N/A	N/A	N/A	N/A	N/A	N/A	N/A
	Repo	UAShisYFP/+;dilp-6GAL4/+	6
	Pros	UAShisYFP/+;dilp-6GAL4/+	4
	Elav	UAShisYFP/+;dilp-6GAL4/+	6
Fig. 4C		Data	Number of replicates					Mean±s.d.		One Way ANOVA
	qRT-PCR in kon LOF	UAS-konRNAi[KK102101]/+	3		One-Way ANOVA				F (2, 6) = 6.069	0.0362
	dilp-6 mRNA	kon[c452] UAS-konRNAi[KK102101]/+ ; elavGal4/+	3	UAS-konRNAi[KK102101]/+ vs kon[c452] UAS-konRNAi[KK102101]/+ ; elavGal4/+				0.833 ± 0.046			ns
		kon[c452] UAS-konRNAi[KK102101]/+ ; repoGal4/+	3	UAS-konRNAi[KK102101]/+ vs kon[c452] UAS-konRNAi[KK102101]/+ ; repoGal4/+				0.393 ± 0.266			*
Fig. 4D		Data	Number of replicates					Mean±s.d.		One Way ANOVA
	qRT-PCR in kon GOF	UAS kon FL1-4/+	3		One-Way ANOVA				F (2, 6) = 2.841	0.1355
	dilp-6 mRNA	elavGal4/UAS kon FL1-4	3	UAS kon FL1-4/+ vs elavGal4/UAS kon FL1-4				1.133 ± 0.297			ns
		repoGal4/UAS konFL1-4	3	UAS kon FL1-4/+ vs repoGal4/UAS konFL1-4				0.850 ± 0.234			ns
Fig. 4E,F		Data	Number of larvae
	InR-GAL4 expression in L3-L3W VNC				N/A	N/A	N/A	N/A	N/A	N/A	N/A
	Repo	UAShisYFP/+;InRGAL4[NP2552]/+	25
	Elav	UAShisYFP/+;InRGAL4[NP2552]/+	6
Fig. 5A		Genotype	Number of larvae
	kon[ICD-HA] is in nuclei, anti-HA	repoGAL4xUAS Kon[ICD-HA]	4		N/A	N/A	N/A	N/A	N/A	N/A	N/A
Fig. 5B,C		Genotype	Number of larvae			Kolmogorov-Smirnov	Bartlett's test	Mean±s.d.		One Way ANOVA
	YFP+ Cell counts kon dilp-6 glial loop	UAShisYFP/+RepoGAL4/+	28		One Way ANOVA	>0.1000	0.012	466.4 ± 24.67	F (3, 74) = 28.27	P < 0.0001	Tukey's multiple comparison
		UAShisYFP;RepoGAL4xUASkon[ICD]	17	UAShisYFP/+RepoGAL4/+ vs UAShisYFP;RepoGAL4xUASkon[ICD]		>0.1000		495.5 ± 35.98			0.0026	**
		UAShisYFP/+;RepoGAL4/UASdilp-6	18	UAShisYFP/+RepoGAL4/+ vs UAShisYFP/+;RepoGAL4/UASdilp-6		>0.1000		495.5 ± 23.60			0.0021	**
		UAShisYFP/InRDN[k1409A];RepoGAL4/UASdilp-6	15	UAShisYFP/+RepoGAL4/+ vs UAShisYFP/InRDN[k1409A];RepoGAL4/UASdilp-6		>0.1000		422.5 ± 14.64			<0.0001	****
				UAShisYFP;RepoGAL4xUASkon[ICD] vs UAShisYFP/+;RepoGAL4/UASdilp-6							> 0.9999	ns
				UAShisYFP;RepoGAL4xUASkon[ICD] vs UAShisYFP/InRDN[k1409A];RepoGAL4/UASdilp-6							<0.0001	****
				UAShisYFP/+;RepoGAL4/UASdilp-6 vs UAShisYFP/InRDN[k1409A];RepoGAL4/UASdilp-6							<0.0001	****
Fig. 5D,E		Genotype	Number of larvae			Kolmogorov-Smirnov	Levene's test	Mean±s.d.		Student t test
	Dpn+ cells in abdominal VNC in kon RNAi KD in NBs	inscGAL4[Mz1407]/+	10		Unpaired Student t test	>0.1000	0.7511	50 ± 6.325	t=1.042 df=18	0.3111	ns
		inscGAL4[Mz1407]/UAS-konRNAi[KK102101]	10	inscGAL4[Mz1407]/+ vs inscGAL4[Mz1407]/UAS-konRNAi[KK102101]		>0.1000		47.20 ± 5.673
Fig. 6A,B,C,D		Genotype	Number of larvae			Kolmogorov-Smirnov	Bartlett's test	Mean±s.d.		One Way ANOVA
	Dpn+ cells in abdominal VNC with ia-2 and dilp-6 over-expression in glia	ia-2YFP/+	11	ia-2YFP/+	One Way ANOVA	>0.1000	< 0.0001	12.09 ± 4.527	F (6, 53) = 10.55	P < 0.0001	Tukey's multiple comparison
		ia-2YFP/+;repoGAL4/UASkonFL	13	ia-2YFP/+ vs ia-2YFP,/+;repoGAL4/UASkonFL		>0.1000		14.77 ± 5.036			0.9843	ns
		ia-2YFP/+; repoGAL4/UASia-2attP2	8	ia-2YFP/+ vs ia-2YFP/+; repoGAL4/UASia-2att P2		>0.1000		30.88 ± 10.37			0.0002	***
		ia-2YFP/+; repoGAL4/UASdilp-6	7	ia-2YFP/+ vs ia-2YFP/+; repoGAL4/UASdilp-6		>0.1000		33.43 ± 19.47			< 0.0001	****
		ia-2YFP/UASkon-RNAi[KK102101]; repoGAL4/UASia-2attP2,	8	ia-2YFP/+ vs ia-2YFP/UASkon-RNAi[106680]; repoGAL4/UASia-2attP2,		>0.1000		9.375 ± 3.662			0.9921	ns
		ia-2YF/dilp-6-RNAi;repoGAL4/UASia-2attP2	8	ia-2YFP/+ vs ia-2YF/dilp-6-RNAi;repoGAL4/UASia-2attP2		>0.1000		17.50 ± 3.117			0.8037	ns
		ia-2YFP/ UASInRDN[k1409A]; repoGAL4/UAS dilp-6	5	ia-2YFP/+ vs ia-2YFP/ UASInRDN[k1409A]; repoGAL4/UAS dilp-6		>0.1000		10.00 ± 1.581			0.9992	ns
				ia-2YFP/+; repoGAL4/UASia-2 vs ia-2YF/dilp-6-RNAi;repoGAL4/UASia-2							0.0354	*
				ia-2YFP/+; repoGAL4/UASia-2 vs ia-2YFP/UASkon-RNAi[106680]; repoGAL4/UASia-2,							< 0.0001	****
				ia-2YFP/+; repoGAL4/UASdilp-6 vs ia-2YFP/ UASInRDN[k1409A]; repoGAL4/UAS dilp-6							0.0003	***
Fig. 7A,B,C,D,E,F		Genotype	Number of larvae
	Dpn+ cells in whole and thoracic VNCs of dilp-6, ras and PI3K over-expression in glia	repoGAL4/+	5
		repoGAL4/UASdilp-6	10
		tubGAL80tsrepoGAL4/UASrasV12	3
		UASdilp-6/+;tubGAL80tsrepoGAL4/UASrasV12	10
		UASDp110CAAX;;tubGAL80tsrepoGAL4/+	7
		UASDp110CAAX;UASdilp-6/+;tubGAL80tsrepoGAL4/+	10
Fig. 7G,J		Genotype	Number of larvae			Kolmogorov-Smirnov	Levene's test	Mean±s.d.		Student t test
	Intensity of Dpn+ cells in abdominal VNC with dilp-6 over-expression in glia	repoGAL4/+	5	repoGAL4/+	Unpaired Student t test	> 0.1000	0.0128	1.356 ±0.05137	t=3.446 df=13	0.0043	**
		repoGAL4/UASdilp-6	10	repoGAL4/+ vs repoGAL4/UASdilp-6		> 0.1000		1.708 ± 0.2214
Fig. 7H,K		Genotype	Number of larvae			Kolmogorov-Smirnov		Mean±s.d.		One Way ANOVA
	Intensity of Dpn+ cells in abdominal VNC with ras over-expression in glia	tubGAL80tsrepoGAL4/+	12	tubGAL80tsrepoGAL4/+	One Way ANOVA	> 0.1000		1.402 ± 0.05439	F (2, 22) = 49.51	< 0.0001	Tukey's multiple comparison
		tubGAL80tsrepoGAL4/UASrasV12	3	tubGAL80tsrepoGAL4/+ vs tubGAL80tsrepoGAL4/UASrasV12		n is too small		1.684 ± 0.2153			0.0151	*
		UASdilp-6/+;tubGAL80tsrepoGAL4/UASrasV12	10	tubGAL80tsrepoGAL4/+ vs UASdilp-6/+;tubGAL80tsrepoGAL4/UASrasV12		> 0.1000		2.010 ± 0.5994			< 0.0001	****
				tubGAL80tsrepoGAL4/UASrasV12 vs UASdilp-6/+;tubGAL80tsrepoGAL4/UASrasV12							0.0059	**
Fig. 7I,L		Genotype	Number of larvae			Kolmogorov-Smirnov	Bartlett's test	Mean±s.d.		One Way ANOVA
	Intensity of Dpn+ cells in abdominal VNC with PI3K over-expression in glia	tubGAL80tsrepoGAL4/+	12	tubGAL80tsrepoGAL4/+	One Way ANOVA	> 0.1000	< 0.0001	1.402 ± 0.05439	F (2, 23) = 16.08	< 0.0001	Tukey's multiple comparison
		UASDp110CAAX;;tubGAL80tsrepoGAL4/+	7	tubGAL80tsrepoGAL4/+ vs UASDp110CAAX;;tubGAL80tsrepoGAL4/+		> 0.1000		1.515 ± 0.07815			0.8189
		UASDp110CAAX;UASdilp-6/+;tubGAL80tsrepoGAL4/+	10	tubGAL80tsrepoGAL4/+ vs UASDp110CAAX;UASdilp-6/+;tubGAL80tsrepoGAL4/+		> 0.1000		2.42 ± 0.759			< 0.0001	****
				UASDp110CAAX;;tubGAL80tsrepoGAL4/+ vs UASDp110CAAX;UASdilp-6/+;tubGAL80tsrepoGAL4/+							0.0007	***
Fig. 7M		Genotype	Number of larvae			Kolmogorov-Smirnov		Mean±s.d.
	Dpn+ cells in abdominal VNC with dilp-6 over-expression in glia	repoGAL4/+	5	repoGAL4/+	Mann Whitney U-test	0.028	N/A	29.4 ± 9.737	sum of ranks 18 , 102	0.004	**
		repoGAL4/UASdilp-6	10	repoGAL4/+ vs repoGAL4/UASdilp-6		> 0.1000		48.4 ± 10.55	Mann-Whitney U =3
Fig. 7N		Genotype	Number of larvae			Kolmogorov-Smirnov	Bartlett's test	Mean±s.d.		One Way ANOVA
	Dpn+ cells in abdominal VNC with ras over-expression in glia	tubGAL80tsrepoGAL4/+	12	tubGAL80tsrepoGAL4/+	One Way ANOVA	> 0.1000		43.75 ± 9.507	F (2, 22) = 193.4	P < 0.0001	Tukey's multiple comparison
		tubGAL80tsrepoGAL4/UASrasV12	3	tubGAL80tsrepoGAL4/+ vs tubGAL80tsrepoGAL4/UASrasV12		n is too small		36.67 ± 10.26			0.5781	ns
		UASdilp-6/+;tubGAL80tsrepoGAL4/UASrasV12	10	tubGAL80tsrepoGAL4/+ vs UASdilp-6/+;tubGAL80tsrepoGAL4/UASrasV12		> 0.1000		129.4 ±12.42			< 0.0001	****
				tubGAL80tsrepoGAL4/UASrasV12 vs UASdilp-6/+;tubGAL80tsrepoGAL4/UASrasV12							< 0.0001	****
Fig. 7O		Genotype	Number of larvae			Kolmogorov-Smirnov	Bartlett's test	Mean±s.d.		One Way ANOVA
	Dpn+ cells in abdominal VNC with ras over-expression in glia	tubGAL80tsrepoGAL4/+	12	tubGAL80tsrepoGAL4/+	One Way ANOVA	> 0.1000	0.9151	43.75 ± 9.507	F (2, 26) = 22.49	P < 0.0001	Tukey's multiple comparison
		UASDp110CAAX;;tubGAL80tsrepoGAL4/+	7	tubGAL80tsrepoGAL4/+ vs UASDp110CAAX;;tubGAL80tsrepoGAL4/+		> 0.1000		62.43 ± 11.06			0.0016	**
		UASDp110CAAX;UASdilp-6/+;tubGAL80tsrepoGAL4/+	10	tubGAL80tsrepoGAL4/+ vs UASDp110CAAX;UASdilp-6/+;tubGAL80tsrepoGAL4/+		> 0.1000		71.9 ± 9.871			< 0.0001	****
				UASDp110CAAX;;tubGAL80tsrepoGAL4/+ vs UASDp110CAAX;UASdilp-6/+;tubGAL80tsrepoGAL4/+							0.1531	ns
Fig. 8A,B		Genotype	Number of larvae
	Ectopic Dpn+ cells have glial markers
	Dpn, repo	repoGAL4/UASdilp-6	10		N/A	N/A	N/A	N/A	N/A	N/A	N/A
Fig. 8C,D		Genotype	Number of larvae
	Midline Dpn+ cells can be wrapper+	UAShisYFP/+;RepoGAL4/UASdilp-6	6		N/A	N/A	N/A	N/A	N/A	N/A	N/A
	Dpn, wrapper
Fig. 8E,F		Genotype	Number of larvae
	Ectopic Dpn+ cells can be Repo- and Wrap-	UAShisYFP/+;RepoGAL4/UASdilp-6	6		N/A	N/A	N/A	N/A	N/A	N/A	N/A
	hisYFP, Dpn, wrapper
Fig. 8G,H		Genotype	Number of larvae
	Ectopic Dpn+ cells are derived from glia
	eGFP, RFP, Dpn	UASGTRACE/+;RepoGAL4/UASia-2attP2	8		N/A	N/A	N/A	N/A	N/A	N/A	N/A
Fig. 9A,B,C,A',B',C',D		Genotype	Number of larvae			Kolmogorov-Smirnov	Levene's test	Mean±s.d.		Student t test
	OE of dilp-6 casues ectopic Dpn+ cells that can be PCNAGFP+	PCNAGFP/+;; hsGAL4/+	7		Unpaired Student t test	>0.10000	0.7962	5.143 ± 2.968	t=5.483 df=15	< 0.0001	****
	GFP, Dpn	PCNAGFP/+;;hGAL4/UASdilp-6	10	PCNAGFP/+;; hsGAL4/+ vs PCNAGFP/+;;hGAL4/UASdilp-6		>0.10000		12.80 ± 2.741
Fig. 9E,F,G,E',F',G',H		Genotype	Number of larvae							Fisher's exact test
	OE of dilp-6 induced PCNA-GFP+ in Wrp+ cells and increased Wrp+ cell number	PCNAGFP/+;; hsGAL4/+	5		Fisher's exact test	N/A	N/A	N/A		0.0276	*
		PCNAGFP/+;; hsGAL4/UASdilp-6	8	PCNAGFP/+;; hsGAL4/+ vs PCNAGFP/+;;hsGAL4/UASdilp-6
Fig. 9I,J,I',J'		Genotype	Number of larvae			Kolmogorov-Smirnov	Bartlett's test	Mean±s.d.		One Way ANOVA
	Over-expression of dilp-6 and ia-2 in glia induces PCNAGFP+ Wrap+ midline Dpn+ cells	PCNAGFP/+;;hGAL4/UASdilp-6	4
		PCNAGFP/+;;hGAL4/UASia-2	11
Fig. 9K,K'		Genotype	Number of larvae
	Dpn+ PH3+ wrap+ cells in over-expression of ia-2 in glia	RepoGAL4/UASia-2attp2	10
Fig. 10A,B		Genotype	Number of larvae
	dilp-6 reprogrammed glia become neurogenic	UASFlyBow/+; pros[voila] GAL4/UASdilp-6	8	UASFlyBow/+; pros[voila] GAL4/UASdilp-6	N/A	N/A	N/A	N/A	N/A	N/A	N/A
	GFP, Dpn, Elav
Fig. 10C,D		Genotype	Number of larvae
	dilp-6 reprogrammed glia become neurogenic	act>y+>GAL4, UASGFP/UASFLP; RepoGAL4/UASdilp-6	22	act>>GAL4, UASGFP/UASFLP; RepoGAL4/UASdilp-6	N/A	N/A	N/A	N/A	N/A	N/A	N/A
	GFP, Dpn, Elav
Figure 1 -Figure Suppl 1C		Genotype	Number of larvae	(abbreviated genotypes)		Kolmogorov-Smirnov		Mean±s.d.		One Way ANOVA	Dunnet's Multiple Comparison Test
	Predicted interactors of Kon. Length of VNC (mm), screening when Kon is overexpressed and other genes are targeted with RNAi	UASFlyBow 1.1/+ repoGAL4/+	24	repo>FlyBow vs repo>FlyBow, Kon	One Way ANOVA	0.0452		0.3766 ± 0.101	F(9, 99) = 51.53	P <0.0001	<0.0001	****
		UASFlyBow 1.1 UAS kon/+; repoGAL4/+	9			>0.1000		1.356 ± 0.447			NA	NA
		UASFlyBow 1.1 UAS kon/+; repoGAL4/UAS-fak56D RNAi[TRiP.JF02484]	10	repo>FlyBow kon fak56D RNAi vs repo>FlyBow, kon		<0.0001		0.4582 ± 0.218			0.0051	**
		UASFlyBow 1.1 UAS kon/+; repoGAL4/UAS-grip RNAi[TRIPJF02969]	7	repo>FlyBow kon grip RNAi vs repo>FlyBow, kon		>0.1000		0.9771 ± 0.5084			>0.9999	ns
		UASFlyBow 1.1 UAS kon/UAS-metro RNAi[TRiP.HMC04629]; repoGAL4/+	10	repo>FlyBow kon metro RNAi vs repo>FlyBow, kon		0.0002		0.35 ± 0.1147			<0.0001	****
		UASFlyBow 1.1 UAS kon/+; repoGAL4/UAS-sdc RNAi[TRiP.HMC03265]	7	repo>FlyBow kon sdc RNAi vs repo>FlyBow, kon		>0.1000		0.8465 ± 0.4263			>0.9999	ns
		UASFlyBow 1.1 UAS kon/+; repoGAL4/UAS-fz RNAi[TRiP.HMS01308]	11	repo>FlyBow kon fz RNAi vs repo>FlyBow, kon		0.0258		0.8927 ± 0.5101			0.6482	ns
		UASFlyBow 1.1 UAS kon/+; repoGAL4/UAS-vang RNAi[TRiP.HMS01343]	10	repo>FlyBow kon vang RNAi vs repo>FlyBow, kon		0.0203		0.8243 ± 0.4352			>0.9999	ns
		UASFlyBow 1.1 UAS kon/+; repoGAL4/UAS-wnt5RNAi[TRiP.HMS01119]	11	repo>FlyBow kon wnt5 RNAi vs repo>FlyBow, kon		0.0378		0.4873 ± 0.1629			0.0464	*
		UASFlyBow 1.1/+; elavGAL4/+	24	elav>FlyBow vs elav>FlyBow, Kon	One Way ANOVA	>0.1000		0.3599 ± 0.08152	F(9, 108) = 51.63	<0.0001	0.0003	***
		UASFlyBow 1.1 UAS kon/+; elavGAL4/+	10			0.0119		0.7479 ± 0.3552			NA	NA
		UASFlyBow 1.1 UAS kon/+; elavGAL4/UAS-fak56D RNAi[TRiP.JF02484]	9	elav>FlyBow, kon fak RNAi vs elav>FlyBow, kon		>0.1000		0.6393 ± 0.1847			>0.9999	ns
		UASFlyBow 1.1 UAS kon/+; elavGAL4/UAS-grip RNAi[TRIPJF02969]	14	elav>FlyBow, kon grip RNAi vs elav>FlyBow, kon		>0.1000		0.524 ± 0.1331			>0.9999	ns
		UASFlyBow 1.1 UAS kon/UAS-metro RNAi[TRiP.HMC04629]; elavGAL4/+	11	elav>FlyBow, kon metro RNAi vs elav>FlyBow, kon		0.0695		0.6558 ± 0.1468			>0.9999	ns
		UASFlyBow 1.1 UAS kon/+; elavGAL4/UAS-sdc RNAi[TRiP.HMC03265]	4	elav>FlyBow, kon sdc RNAi vs elav>FlyBow, kon		n too small		0.6942 ± 0.3992			>0.9999	ns
		UASFlyBow 1.1 UAS kon/+; elavGAL4/UAS-fz RNAi[TRiP.HMS01308]	10	elav>FlyBow, kon fz RNAi vs elav>FlyBow, kon		>0.1000		0.515 ± 0.1384			>0.9999	ns
		UASFlyBow 1.1 UAS kon/+; elavGAL4/UAS-vang RNAi[TRiP.HMS01343]	16	elav>FlyBow, kon vang RNAi vs elav>FlyBow, kon		>0.1000		0.7044 ± 0.1949			>0.9999	ns
		UASFlyBow 1.1 UAS kon/+; elavGAL4/UAS-wnt5RNAi[TRiP.HMS01119]	10	elav>FlyBow, kon wnt5 RNAi vs elav>FlyBow, kon		>0.1000		0.7946 ± 0.2079			>0.9999	ns
Figure 1 -Figure Suppl 1D		Genotype	Number of larvae	(abbreviated genotypes)		Kolmogorov-Smirnov		Mean±s.d.		One Way ANOVA	Dunnet's Multiple Comparison Test
	Secretases. Length of VNC (mm), screening when kon is overexpressed and other genes are targeted with RNAi	UASFlyBow 1.1/+; repoGAL4/+	24	repo>FlyBow vs repo>FlyBow, kon	One Way ANOVA	0.0452		0.3766 ± 0.101	F(5,60) = 35.04	P <0.0001	<0.0001	****
		UASFlyBow 1.1 UAS kon/+; repoGAL4/+	9			>0.1000		1.356 ± 0.447			NA	NA
		UASFlyBow 1.1 UAS kon/+; repoGAL4/UAS-psn RNAi[TRiP.JF02760]	5	repo>FlyBow kon psn RNAi vs repo>FlyBow, kon		>0.1000		1.097 ± 0.4266			>0.9999	ns
		UASFlyBow 1.1 UAS kon/+; repoGAL4/UAS-kuz RNAi[KK103555]	11	repo>FlyBow kon kuz RNAi vs repo>FlyBow, kon		0.0015		0.4296 ± 0.1546			0.0067	**
		UASFlyBow 1.1 UAS kon/UAS-kul RNAi[TRiP.HMC03803]; repoGAL4/+	11	repo>FlyBow kon kul RNAi vs repo>FlyBow, kon		>0.1000		0.3195 ± 0.06154			<0.0001	****
		UASFlyBow 1.1/+; elavGAL4/+	24	elav>FlyBow vs elav>FlyBow, Kon	One Way ANOVA	>0.1000		0.3599 ± 0.08152	F(5,58)=38.11	P <0.0001	0.0004	***
		UASFlyBow 1.1 UAS kon/+; elavGAL4/+	10			0.0119		0.7479 ± 0.3552			NA	NA
		UASFlyBow 1.1 UAS kon/+; elavGAL4/UAS-psn RNAi[TRiP.JF02760]	10	elav>FlyBow, kon psn RNAi vs elav>FlyBow, kon		0.0893		0.9581±0.3496			>0.9999	ns
		UASFlyBow 1.1 UAS kon/+; elavGAL4/UAS-kuz RNAi[KK103555]	4	elav>FlyBow, kon kuz RNAi vs elav>FlyBow, kon		n too small		0.7761±0.1318			>0.9999	ns
		UASFlyBow 1.1 UAS kon/UAS-kul RNAi[TRiP.HMC03803];elavGAL4/+	10	elav>FlyBow, kon kul RNAi vs elav>FlyBow, kon		>0.1000		0.6739±0.2279			>0.9999	ns
Figure 1 -Figure Suppl 1E		Genotype	Number of larvae	(abbreviated genotypes)		Kolmogorov-Smirnov		Mean±s.d.		One Way ANOVA	Dunnet's Multiple Comparison Test
	Transmembrane proteins and known partners. Length of VNC (mm), screening when kon is overexpressed and other genes are targeted with RNAi	UASFlyBow 1.1/+; repoGAL4/+	24	repo>FlyBow vs repo>FlyBow, kon	One Way ANOVA	0.0452		0.3766 ± 0.101	F(14,152) =94.82	<0.0001	<0.0001	****
		UASFlyBow 1.1 UAS kon/+; repoGAL4/+	10			>0.1000		1.356 ± 0.447			NA	NA
		UASFlyBow 1.1 UAS kon/+; repoGAL4/UAS-cadN RNAi[TRiP.JF02653]	11	repo>FlyBow kon cadN RNAi vs repo>FlyBow, kon		0.054		0.6748 ± 0.3488			0.3667	ns
		UASFlyBow 1.1 UAS kon/+; repoGAL4/UAS-cadN2 RNAi[TRiP.JF02658]	10	repo>FlyBow kon cadN2 RNAi vs repo>FlyBow, kon		>0.1000		0.325 ± 0.03549			<0.0001	****
		UASFlyBow 1.1 UAS kon/+; repoGAL4/UAS-ds RNAi[TRiP.HMS00759]	10	repo>FlyBow kon ds RNAi vs repo>FlyBow, kon		>0.1000		1.06 ± 0.3147			>0.9999	ns
		UASFlyBow 1.1 UAS kon/+; repoGAL4/UAS-ft RNAi[TRiP.JF03245]	14	repo>FlyBow kon ft RNAi vs repo>FlyBow, kon		<0.0001		0.3966 ± 0.2709			<0.0001	****
		UASFlyBow 1.1 UAS kon/+; repoGAL4/UAS-shg RNAi[TRiP.JF02769]	9	repo>FlyBow kon shg RNAi vs repo>FlyBow, kon		0.0198		0.5057 ± 0.2476			0.036	*
		UASFlyBow 1.1 UAS kon/+; repoGAL4/UAS-stan RNAi[TRiP.JF02047]	8	repo>FlyBow kon stan RNAi vs repo>FlyBow, kon		0.0066		0.7557 ± 0.4331			>0.9999	ns
		UASFlyBow 1.1 UAS kon/+; repoGAL4/UAS-if RNAi[TRiP.JF02695]	11	repo>FlyBow kon if RNAi vs repo>FlyBow, kon		>0.1000		1.479 ± 0.4433			>0.9999	ns
		UASFlyBow 1.1 UAS kon/+; repoGAL4/UAS-mew RNAi[TRiP.JF02694]	11	repo>FlyBow kon mew RNAi vs repo>FlyBow, kon		>0.1000		1.39 ± 0.263			>0.9999	ns
		UASFlyBow 1.1 UAS kon/+; repoGAL4/UAS-mys RNAi[TRiP.JF02819]	3	repo>FlyBow kon mys RNAi vs repo>FlyBow, kon		n too small		0.4371 ± 0.08027			0.5295	ns
		UASFlyBow 1.1 UAS kon/+; repoGAL4/UAS-eys RNAi[TRiP.JF01069]	10	repo>FlyBow kon eys RNAi vs repo>FlyBow, kon		>0.1000		0.9868 ± 0.5894			>0.9999	ns
		UASFlyBow 1.1 UAS kon/+; repoGAL4/UAS-lanB2 RNAi[TRiP.HMC04076]	10	repo>FlyBow kon lnB2 RNAi vs repo>FlyBow, kon		>0.1000		0.8783 ± 0.4562			>0.9999	ns
		UASFlyBow 1.1 UAS kon/+; repoGAL4/UAS-wde RNAi[TRiP.HMS00205]	11	repo>FlyBow kon wde RNAi vs repo>FlyBow, kon		>0.1000		1.043 ± 0.3031			>0.9999	ns
		UASFlyBow 1.1/+; elavGAL4/+	24	elav>FlyBow vs elav>FlyBow, Kon	One Way ANOVA	>0.1000		0.3599 ± 0.08152	F(14,174) = 78.23	P <0.0001	0.0005	***
		UASFlyBow 1.1 UAS kon/+; elavGAL4/+	10			0.0119		0.7479 ± 0.3552			NA	NA
		UASFlyBow 1.1 UAS kon/+; elavGAL4/UAS-cadN RNAi[TRiP.JF02653]	12	elav>FlyBow, kon cadN RNAi vs elav>FlyBow, kon		>0.1000		0.6978±0.2621			>0.9999	ns
		UASFlyBow 1.1 UAS kon/+; elavGAL4/UAS-cadN2 RNAi[TRiP.JF02658]	15	elav>FlyBow, kon cadN2 RNAi vs elav>FlyBow, kon		0.0077		0.7375±0.2669			>0.9999	ns
		UASFlyBow 1.1 UAS kon/+; elavGAL4/UAS-ds RNAi[TRiP.HMS00759]	13	elav>FlyBow, kon ds RNAi vs elav>FlyBow, kon		0.0386		0.6911±0.1610			>0.9999	ns
		UASFlyBow 1.1 UAS kon/+; elavGAL4/UAS-ft RNAi[TRiP.JF03245]	19	elav>FlyBow, kon ft RNAi vs elav>FlyBow, kon		>0.1000		0.708±0.2469			>0.9999	ns
		UASFlyBow 1.1 UAS kon/+; elavGAL4/UAS-shg RNAi[TRiP.JF02769]	9	elav>FlyBow, kon shg RNAi vs elav>FlyBow, kon		>0.1000		0.6796±0.1588			>0.9999	ns
		UASFlyBow 1.1 UAS kon/+; elavGAL4/UAS-stan RNAi[TRiP.JF02047]	13	elav>FlyBow, kon stan RNAi vs elav>FlyBow, kon		0.0278		0.4733±0.1686			0.2854	ns
		UASFlyBow 1.1 UAS kon/+; elavGAL4/UAS-if RNAi[TRiP.JF02695]	8	elav>FlyBow, kon if RNAi vs elav>FlyBow, kon		>0.1000		0.7249±0.1986			>0.9999	ns
		UASFlyBow 1.1 UAS kon/+; elavGAL4/UAS-mew RNAi[TRiP.JF02694]	15	elav>FlyBow, kon mew RNAi vs elav>FlyBow, kon		0.0522		0.5375±0.1519			>0.9999	ns
		UASFlyBow 1.1 UAS kon/+; elavGAL4/UAS-mys RNAi[TRiP.JF02819]	8	elav>FlyBow, kon mys RNAi vs elav>FlyBow, kon		>0.1000		0.3846±0.08407			0.033	*
		UASFlyBow 1.1 UAS kon/+; elavGAL4/UAS-eys RNAi[TRiP.JF01069]	10	elav>FlyBow, kon eys RNAi vs elav>FlyBow, kon		>0.1000		0.7298±0.145			>0.9999	ns
		UASFlyBow 1.1 UAS kon/+; elavGAL4/UAS-lanB2 RNAi[TRiP.HMC04076]	3	elav>FlyBow, kon lanB2 RNAi vs elav>FlyBow, kon		n too small		0.5587±0.1174			>0.9999	ns
		UASFlyBow 1.1 UAS kon/+; elavGAL4/UAS-wde RNAi[TRiP.HMS00205]	15	elav>FlyBow, kon wde RNAi vs elav>FlyBow, kon		>0.1000		0.7638±0.2403			>0.9999	ns
Figure 1 -Figure Suppl 1F		Genotype	Number of larvae	(abbreviated genotypes)		Kolmogorov-Smirnov		Mean±s.d.		One Way ANOVA
	Cytoplasmic phosphatases. Length of VNC (mm), screening when Kon is overexpressed and other genes are targeted with RNAi	UASFlyBow 1.1/+; repoGAL4/+	24	repo>FlyBow vs repo>FlyBow, kon	One Way ANOVA	0.0452		0.3766 ± 0.101	F(6,78) = 41.99	P <0.0001	<0.0001	****
		UASFlyBow 1.1 UAS kon/+; repoGAL4/+	9			>0.1000		1.356 ± 0.447			NA	NA
		UASFlyBow 1.1 UAS kon/+; repoGAL4/UAS-eya RNAi[TRiP.JF03160]	10	repo>FlyBow kon eya RNAi vs repo>FlyBow, kon		0.0001		0.6251±0.3721			0.0143	*
		UASFlyBow 1.1 UAS kon/+; repoGAL4/UAS-mtm RNAi[TRiP.JF01114]	10	repo>FlyBow kon mtm RNAi vs repo>FlyBow, kon		0.0269		0.483±0.1916			0.003	**
		UASFlyBow 1.1 UAS kon/+; repoGAL4/UAS-prl1 RNAi[TRIPPMAS01826]	15	repo>FlyBow kon prl1 RNAi vs repo>FlyBow, kon		>0.1000		0.9375±0.4272			>0.9999	ns
		UASFlyBow 1.1 UAS kon/UAS-Ssu72 RNAi[TRiP.HMS04461]; repoGAL4/+	10	repo>FlyBow kon Ssu72 RNAi vs repo>FlyBow, kon		>0.1000		0.5965±0.2453			0.0483	*
		UASFlyBow 1.1/+; elavGAL4/+	24	elav>FlyBow vs elav>FlyBow, Kon	One Way ANOVA	>0.1000		0.3599 ± 0.08152	F(6,86)=44.47	P <0.0001	0.0001	***
		UASFlyBow 1.1 UAS kon/+; elavGAL4/+	10			0.0119		0.7479 ± 0.3552			NA	NA
		UASFlyBow 1.1 UAS kon/+; elavGAL4/UAS-eya RNAi[TRiP.JF03160]	22	elav>FlyBow kon eya RNAi vs repo>FlyBow, kon		>0.1000		0.556±0.1446			>0.9999	ns
		UASFlyBow 1.1 UAS kon/+; elavGAL4/UAS-mtm RNAi[TRiP.JF01114]	12	elav>FlyBow kon mtm RNAi vs repo>FlyBow, kon		0.0126		0.6542±0.1341			>0.9999	ns
		UASFlyBow 1.1 UAS kon/+; elavGAL4/UAS-prl1 RNAi[TRIPPMAS01826]	11	elav>FlyBow kon prl1 RNAi vs repo>FlyBow, kon		0.0133		0.4389±0.1819			0.0191	*
		UASFlyBow 1.1 UAS kon/UAS-Ssu72 RNAi[TRiP.HMS04461]; elavGAL4/+	7	elav>FlyBow kon Ssu72 RNAi vs repo>FlyBow, kon		>0.1000		0.816±0.2383			>0.9999	ns
Figure 1 -Figure Suppl 2C		Genotype	Number of Larvae	(abbreviated genotypes)		Kolmogorov-Smirnov		Mean±s.d.		KW ANOVA	Dunn's multiple comparison test
	RNAi screen for genes that rescue the phenotype of kon overexpression in glia	UASFlyBow 1.1 UAS kon/+; repoGAL4/UAS-Akap200RNAi [TRIPHMSO18]	26	repo>FlyBow kon Akap200 RNAi vs repo>FlyBow, kon	Kruskal-Wallis ANOVA	0		0.1182± 0.0560	KW: 137.6	P<0.0001	P<0.001
		UASFlyBow 1.1 UAS kon/+; repoGAL4/UAS-gripRNAi [TRIPJF02969]	26	repo>FlyBow kon gripRNAi vs repo>FlyBow, kon		0.003		0.1598± 0.0809			P<0.01
		UASFlyBow 1.1 UAS kon/+; repoGAL4/UAS-LarRNAi [TRIPHMSO2186]	28	repo>FlyBow kon Lar RNAi vs repo>FlyBow, kon		0		0.1326± 0.05332			P<0.01
		UASFlyBow 1.1 UAS kon/+; repoGAL4/UAS-ptp99ARNAi [TRIPJF01858]	26	repo>FlyBow kon ptp99A RNAi vs repo>FlyBow, kon		0.001		0.2063±0.1151			P<0.01
		UASFlyBow 1.1 UAS kon/+; repoGAL4/UAS-ia-2RNAi [HMS00536]	26	repo>FlyBow kon ia-2 RNAi vs repo>FlyBow, kon		0.026		0.2217±0.1134			ns
		UASFlyBow 1.1 UAS kon/+; repoGAL4/UAS-ptp69DRNAi [TRIPJFO3399]	6	repo>FlyBow kon ptp69D RNAi vs repo>FlyBow, kon		>0.1000		0.2396±0.1210			ns
		UASFlyBow 1.1 UAS kon/+; repoGAL4/UAS-ptp10DRNAi [TRIPHMSO1917]	19	repo>FlyBow kon ptp10D RNAi vs repo>FlyBow, kon		>0.1000		0.2973±0.1192			ns
		UASFlyBow 1.1 UAS kon/+; repoGAL4/UAS-ptp4ERNAi [TRIPHMSO1838]	17	repo>FlyBow kon ptp4E RNAi vs repo>FlyBow, kon		>0.1000		0.3086±0.1111			ns
		UASFlyBow 1.1 UAS kon/+; repoGAL4/UAS-AktRNAi	23	repo>FlyBow kon Akt RNAi vs repo>FlyBow, kon		0.001		0.1178±0.0934			P<0.01
		UASFlyBow 1.1 UAS kon/+; repoGAL4 /UAS-ptp61FRNAi [TRIPHMCO43446]	20	repo>FlyBow kon ptp61F RNAi vs repo>FlyBow, kon		>0.1000		0.259±0.1362			P<0.05
		UASFlyBow 1.1 UAS kon/+; repoGAL4/UAS-hpoRNAi [TRIPHMSO0006]	20	repo>FlyBow kon hpo RNAi vs repo>FlyBow, kon		>0.1000		0.2791±0.1427			P<0.05
		UASFlyBow 1.1 UAS kon/+; repoGAL4/UAS-inaDRNAi [TRiP.HMC03170]	2	repo>FlyBow kon inaD RNAi vs repo>FlyBow, kon				0.2196±0.0399			ns
		UASFlyBow 1.1 UAS kon/+; repoGAL4/+	24			>0.1000		0.4600±0.1429
		UASFlyBow 1.1/+; repoGAL4/+	25	repo>FlyBow vs repo>FlyBow, kon		0		0.0865±0.0207
Figure 1 -Figure Suppl 2D		Genotype	Number of Larvae	(abbreviated genotypes)		Kolmogorov-Smirnov		Mean±s.d.		KW ANOVA	Dunn's multiple comparison test
	RNAi screen for genes that rescue the phenotype of kon overexpression in neurons	UASFlyBow 1.1 UAS kon/+; elavGAL4/UAS-Akap200RNAi [TRIPHMSO18]	23	elav>FlyBow kon Akap200 RNAi vs repo>FlyBow, kon	Kruskal-Wallis ANOVA	0.005		0.1455±0.04615	KW: 89.71	P<0.0001	P<0.001
		UASFlyBow 1.1 UAS kon/+; elavGAL4/UAS-gripRNAi [TRIPJF02969]	31	elav>FlyBow kon gripRNAi vs repo>FlyBow, kon		0		0.1771±0.0762			P<0.001
		UASFlyBow 1.1 UAS kon/+; elavGAL4/UAS-LarRNAi [TRIPHMSO2186]	25	elav>FlyBow kon Lar RNAi vs repo>FlyBow, kon		0.008		0.1928± 0.07188			P<0.01
		UASFlyBow 1.1 UAS kon/+; elavGAL4/UAS-ptp99ARNAi [TRIPJF01858]	20	elav>FlyBow kon ptp99A RNAi vs repo>FlyBow, kon		0.004		0.2280±0.09437			P<0.05
		UASFlyBow 1.1 UAS kon/+; elavGAL4/UAS-ia-2RNAi [HMS00536]	12	elav>FlyBow kon ia-2 RNAi vs repo>FlyBow, kon		0.07		0.2278±0.0746			P<0.05
		UASFlyBow 1.1 UAS kon/+; elavGAL4/UAS-ptp69DRNAi [TRIPJFO3399]	10	elav>FlyBow kon ptp69D RNAi vs repo>FlyBow, kon		>0.1000		0.2041±0.1001			P<0.05
		UASFlyBow 1.1 UAS kon/+; elavGAL4/UAS-ptp10DRNAi [TRIPHMSO1917]	2	elav>FlyBow kon ptp10D RNAi vs repo>FlyBow, kon		>0.1000		0.3655±0.0349			ns
		UASFlyBow 1.1 UAS kon/+; elavGAL4/UAS-ptp4ERNAi [TRIPHMSO1838]	10	elav>FlyBow kon ptp4E RNAi vs repo>FlyBow, kon		0.074		0.2135±0.06637			P<0.05
		UASFlyBow 1.1 UAS kon/+; elavGAL4/UAS-inaDRNAi [TRiP.HMC03170]	5	elav>FlyBow kon Akt RNAi vs repo>FlyBow, kon				0.2199±0.03987			ns
		UASFlyBow 1.1 UAS kon/+; elavGAL4/UAS-AktRNAi	10	elav>FlyBow kon ptp61F RNAi vs repo>FlyBow, kon		>0.1000		0.2465±0.0926			ns
		UASFlyBow 1.1 UAS kon/+; elavGAL4/UAS-hpoRNAi [TRIPHMSO0006]	23	elav>FlyBow kon hpo RNAi vs repo>FlyBow, kon		>0.1000		0.3177±0.09712			ns
		UASFlyBow 1.1 UAS kon/+; elavGAL4 /UAS-ptp61FRNAi [TRIPHMCO43446]	4	elav>FlyBow kon inaD RNAi vs repo>FlyBow, kon				0.2186±0.09694			ns
Figure 1-Figure Suppl3A		Genotype	Number of replicates					Mean±s.d.
	qRT-PCR	UAS-konRNAi[KK102101]	2
	effect of kon RNAi-Knockdown	kon[c452] UAS-konRNAi[KK102101]/+ ; elavGal4/+	2	Kon konRNAi/+ vs w; kon(c452)KonRNAi; elavGal4/+	N/A	N/A	N/A	N/A	N/A	N/A	N/A
		kon[c452] UAS-konRNAi[KK102101]/+ ; repoGal4/+	2	Kon konRNAi/+ vs w; kon(c452)KonRNAi; repoGal4/+	N/A	N/A	N/A	N/A	N/A	N/A	N/A
Figure 1-Figure Suppl 3B		Genotype	Number of replicates					Mean±s.d.
	qRT-PCR	UAS kon FL1-4/+	2
	effect of kon over-expression	elavGal4/UASkon FL1-4	2	UAS kon FL1-4/+ vs elavGal4/UASKon FL1-4	N/A	N/A	N/A	N/A	N/A	N/A	N/A
		repoGal4/UASkon FL1-4	2	UAS kon FL1-4/+ vs repoGal4/UASKon FL1-4	N/A	N/A	N/A	N/A	N/A	N/A	N/A
Figure 1-Figure Suppl 3C		Genotype	Number of replicates					Mean±s.d.
	qRT-PCR	UAS-konRNAi[KK102101]	4	kon mRNA in UAS-konRNAi[KK102101]/+	N/A	N/A	N/A	1 ± 0	N/A	N/A	N/A
	effect of kon RNAi-Knockdown	kon[c452] UAS-konRNAi[KK102101]/+ ; elavGal4/+	4	kon mRNA in UAS-konRNAi[KK102101]/+ vs kon[c452] UAS-konRNAi[KK102101]/+ ; elavGal4/+	N/A	N/A	N/A	0.470 ± 0.066	N/A	N/A	N/A
		kon[c452] UAS-konRNAi[KK102101]/+ ; repoGal4/+	4	kon mRNA in UAS-konRNAi[KK102101]/+ vs kon[c452] UAS-konRNAi[KK102101]/+ ; repoGal4/+	N/A	N/A	N/A	0.552 ± 0.102	N/A	N/A	N/A
				hpo mRNA in UAS-konRNAi[KK102101]/+	N/A	N/A	N/A	1 ± 0	N/A	N/A	N/A
				hpo mRNA in UAS-konRNAi[KK102101]/+ vs kon[c452] UAS-konRNAi[KK102101]/+ ; elavGal4/+	N/A	N/A	N/A	1.029 ± 0.069	N/A	N/A	N/A
				hpo mRNA in UAS-konRNAi[KK102101]/+ vs kon[c452] UAS-konRNAi[KK102101]/+ ; repoGal4/+	N/A	N/A	N/A	0.722 ± 0.32	N/A	N/A	N/A
				ia-2 mRNA in UAS-konRNAi[KK102101]/+	N/A	N/A	N/A	1 ± 0	N/A	N/A	N/A
				ia-2 mRNA in UAS-konRNAi[KK102101]/+ vs kon[c452] UAS-konRNAi[KK102101]/+ ; elavGal4/+	N/A	N/A	N/A	1.092 ± 0.179	N/A	N/A	N/A
				ia-2mRNA in UAS-konRNAi[KK102101]/+ vs kon[c452] UAS-konRNAi[KK102101]/+ ; repoGal4/+	N/A	N/A	N/A	2.444 ± 0.680	N/A	N/A	N/A
				ptp99A mRNA in UAS-konRNAi[KK102101]/+	N/A	N/A	N/A	1 ± 0	N/A	N/A	N/A
				ptp99A mRNA in UAS-konRNAi[KK102101]/+ vs kon[c452] UAS-konRNAi[KK102101]/+ ; elavGal4/+	N/A	N/A	N/A	1.086 ± 0.027	N/A	N/A	N/A
				ptp99A mRNA in UAS-konRNAi[KK102101]/+ vs kon[c452] UAS-konRNAi[KK102101]/+ ; repoGal4/+	N/A	N/A	N/A	1.034 ± 0.332	N/A	N/A	N/A
				ptp69F mRNA in UAS-konRNAi[KK102101]/+	N/A	N/A	N/A	1 ± 0	N/A	N/A	N/A
				ptp69F mRNA in UAS-konRNAi[KK102101]/+ vs kon[c452] UAS-konRNAi[KK102101]/+ ; elavGal4/+	N/A	N/A	N/A	0.861 ± 0.046	N/A	N/A	N/A
				ptp69F mRNA in UAS-konRNAi[KK102101]/+ vs kon[c452] UAS-konRNAi[KK102101]/+ ; repoGal4/+	N/A	N/A	N/A	0.774 ± 0.163	N/A	N/A	N/A
				prl-1 mRNA in UAS-konRNAi[KK102101]/+	N/A	N/A	N/A	1 ± 0	N/A	N/A	N/A
				prl-1 mRNA in UAS-konRNAi[KK102101]/+ vs kon[c452] UAS-konRNAi[KK102101]/+ ; elavGal4/+	N/A	N/A	N/A	1.018 ± 0.072	N/A	N/A	N/A
				prl-1 mRNA in UAS-konRNAi[KK102101]/+ vs kon[c452] UAS-konRNAi[KK102101]/+ ; repoGal4/+	N/A	N/A	N/A	0.745 ± 0.018	N/A	N/A	N/A
				yki mRNA in UAS-konRNAi[KK102101]/+	N/A	N/A	N/A	1 ± 0	N/A	N/A	N/A
				yki mRNA in UAS-konRNAi[KK102101]/+ vs kon[c452] UAS-konRNAi[KK102101]/+ ; elavGal4/+	N/A	N/A	N/A	0.968± 0.164	N/A	N/A	N/A
				yki mRNA in UAS-konRNAi[KK102101]/+ vs kon[c452] UAS-konRNAi[KK102101]/+ ; repoGal4/+	N/A	N/A	N/A	1.271 ± 0.231	N/A	N/A	N/A
				inaD mRNA in UAS-konRNAi[KK102101]/+	N/A	N/A	N/A	1 ± 0	N/A	N/A	N/A
				inaD mRNA in UAS-konRNAi[KK102101]/+ vs kon[c452] UAS-konRNAi[KK102101]/+ ; elavGal4/+	N/A	N/A	N/A	1.288 ± 0.182	N/A	N/A	N/A
				inaD mRNA in UAS-konRNAi[KK102101]/+ vs kon[c452] UAS-konRNAi[KK102101]/+ ; repoGal4/+	N/A	N/A	N/A	0.890 ± 0.110	N/A	N/A	N/A
Figure 1-Figure Suppl 3D		Genotype	Number of replicates					Mean±s.d.
	qRT-PCR	UAS kon FL1-4/+	4	kon mRNA in UAS Kon FL1-4/+	N/A	N/A	N/A	1 ± 0	N/A	N/A	N/A
	effect of kon over-expression	elavGal4/UASkon FL1-4	4	kon mRNA in UAS Kon FL1-4/+ vs elavGal4/UASKon FL1-4	N/A	N/A	N/A	7.838 ± 1.496	N/A	N/A	N/A
		repoGal4/UASkon FL1-4	4	kon mRNA in UAS Kon FL1-4/+4 vs repoGal4/UASKon FL1-4	N/A	N/A	N/A	27.890 ± 1.092	N/A	N/A	N/A
				hpo mRNA in UAS Kon FL1-4/+	N/A	N/A	N/A	1 ± 0	N/A	N/A	N/A
				hpo mRNA in UAS Kon FL1-4/+ vs elavGal4/UASKon FL1-4	N/A	N/A	N/A	1.051 ± 0.123	N/A	N/A	N/A
				hpo mRNA in UAS Kon FL1-4/+4 vs repoGal4/UASKon FL1-4	N/A	N/A	N/A	0.957 ± 0.110	N/A	N/A	N/A
					N/A	N/A	N/A		N/A	N/A	N/A
				ia-2 mRNA in UAS Kon FL1-4/+	N/A	N/A	N/A	1 ± 0	N/A	N/A	N/A
				ia-2 mRNA in UAS Kon FL1-4/+ vs elavGal4/UASKon FL1-4	N/A	N/A	N/A	0.736 ± 0.107	N/A	N/A	N/A
				ia-2 mRNA in UAS Kon FL1-4/+4 vs repoGal4/UASKon FL1-4	N/A	N/A	N/A	0.765 ± 0.094	N/A	N/A	N/A
				ptp99A mRNA in UAS Kon FL1-4/+	N/A	N/A	N/A	1 ± 0	N/A	N/A	N/A
				ptp99A mRNA in UAS Kon FL1-4/+ vs elavGal4/UASKon FL1-4	N/A	N/A	N/A	1.044 ± 0.132	N/A	N/A	N/A
				ptp99A mRNA in UAS Kon FL1-4/+4 vs repoGal4/UASKon FL1-4	N/A	N/A	N/A	0.960 ± 0.186	N/A	N/A	N/A
				ptp69F mRNA in UAS Kon FL1-4/+	N/A	N/A	N/A	1 ± 0	N/A	N/A	N/A
				ptp69F mRNA in UAS Kon FL1-4/+ vs elavGal4/UASKon FL1-4	N/A	N/A	N/A	0.880 ± 0.098	N/A	N/A	N/A
				ptp69F mRNA in UAS Kon FL1-4/+4 vs repoGal4/UASKon FL1-4	N/A	N/A	N/A	0.937 ± 0.079	N/A	N/A	N/A
				prl-1 mRNA in UAS Kon FL1-4/+	N/A	N/A	N/A	1 ± 0	N/A	N/A	N/A
				prl-1 mRNA in UAS Kon FL1-4/+ vs elavGal4/UASKon FL1-4	N/A	N/A	N/A	1.021 ± 0.163	N/A	N/A	N/A
				prl-1 mRNA in UAS Kon FL1-4/+4 vs repoGal4/UASKon FL1-4	N/A	N/A	N/A	1.012 ± 0.070	N/A	N/A	N/A
				yki mRNA in UAS Kon FL1-4/+	N/A	N/A	N/A	1 ± 0	N/A	N/A	N/A
				yki mRNA in UAS Kon FL1-4/+ vs elavGal4/UASKon FL1-4	N/A	N/A	N/A	0.967 ± 0.106	N/A	N/A	N/A
				yki mRNA in UAS Kon FL1-4/+4 vs repoGal4/UASKon FL1-4	N/A	N/A	N/A	1.042 ± 0.154	N/A	N/A	N/A
				inaD mRNA in UAS Kon FL1-4/+	N/A	N/A	N/A	1 ± 0	N/A	N/A	N/A
				inaD mRNA UAS Kon FL1-4/+ vs elavGal4/UASKon FL1-4	N/A	N/A	N/A	0.797 ± 0.239	N/A	N/A	N/A
				inaD mRNA UAS Kon FL1-4/+ vs repoGal4/UASKon FL1-4	N/A	N/A	N/A	1.013 ± 0.083	N/A	N/A	N/A
Figure 2-Figure Suppl1A		Genotype	Number of Larvae
	FasII	wt
	effect of ia-2 LOF GOF	elavGal4/UAS-ia-2RNAi[TRIP HMS00536]	10		N/A	N/A	N/A	N/A	N/A	N/A	N/A
		UAS ia-2[GS11438]/+;elavGal4/+	7		N/A	N/A	N/A	N/A	N/A	N/A	N/A
Figure 2-Figure Suppl1B		Genotype	Number of Larvae
	BP102	wt
	effect of ia-2 LOF GOF	elavGal4/UASia-2RNAi[TRIP HMS00536]	8		N/A	N/A	N/A	N/A	N/A	N/A	N/A
		UAS ia-2[GS11438]/+;elavGal4/+	8		N/A	N/A	N/A	N/A	N/A	N/A	N/A
Figure 2-Figure Suppl1C		Genotype	Number of Larvae
	effect of ia-2 LOF caused overgrowths - Dpn	elavGAL4/+	10		N/A	N/A	N/A	N/A	N/A	N/A	N/A
		elavGAL4/UASia-2attP2	7		N/A	N/A	N/A	N/A	N/A	N/A	N/A
		Df(2L)ED7733 /+;elavGAL4/UASia-2-RNAi [TRIP HMS00536]	12		N/A	N/A	N/A	N/A	N/A	N/A	N/A
Figure 6-Figure Suppl 1A		Genotype	Number of replicates					Mean±s.d.		One WAY ANOVA	Dunn's multiple comparison test
	Dpn+ cells in VNC over-expressing kon[ICD] in neurons and glia	UAS kon ICD/+	8		N/A	N/A	N/A	N/A	N/A	N/A	N/A
		elavGal4/UASkon ICD	10
		repoGal4/UASkon ICD	8
Figure 6-Figure Suppl 2B		Genotype	Number of replicates					Mean±s.d.		One WAY ANOVA	Dunn's multiple comparison test
	qRT-PCR	UAS kon ICD/+	4		One Way ANOVA				F (2, 9) = 72.56	P<0.0001
	level of kon ICD over-expression in neurons or glia	elavGal4/UASkon ICD	4	UAS kon ICD/+ vs elavGal4/UASKon ICD				14.675 ± 6.526			0.0001	***
		repoGal4/UASkon ICD	4	UAS kon ICD/+ vs repoGal4/UASKon ICD				4.638 ± 1.198			<0.0001	****
Figure 6-Figure Suppl 2C		Genotype	Number of replicates					Mean±s.d.		One WAY ANOVA	Dunn's multiple comparison test
	qRT-PCR	UAS kon ICD/+	4		One Way ANOVA					N/S
	level of kon ICD over-expression in neurons or glia	elavGal4/UASkon ICD	4	dilp6 mRNA UAS kon ICD/+ vs elavGal4/UASKon ICD				0.915 ± 0.154	F (2, 9) = 0.1829		NS
		repoGal4/UASkon ICD	4	dilp6 mRNA UAS kon ICD/+ vs repoGal4/UASKon ICD				0.898 ± 0.208			NS
				Dpn mRNA UAS kon ICD/+ vs elavGal4/UASKon ICD				1.135 ± 0.0.193	F (2, 9) = 0.03473		NS
				Dpn mRNA UAS kon ICD/+ vs repoGal4/UASKon ICD				0.988 ± 0.282			NS
